# Supplementary material for: A missense mutation in human INSC causes peripheral neuropathy
Source: PubMed Central journal article supplement (PMC11099080; doi:10.1038/s44321-024-00062-w), 2024-04-08
Supplement: 44321_2024_62_MOESM1_ESM.pdf [file 44321_2024_62_MOESM1_ESM.pdf]

# Appendix

## A missense mutation in human *INSC* causes peripheral neuropathy

### Table of Contents

|                                                                                                                             |    |
|-----------------------------------------------------------------------------------------------------------------------------|----|
| <b>Appendix Fig S1.</b> Clinical pictures of the patients with <i>INSC</i> p.Met70Arg.                                      | 2  |
| <b>Appendix Fig S2.</b> Multipoint parametric linkage analysis of CMT2 in the family.                                       | 3  |
| <b>Appendix Fig S3.</b> <i>hINSC</i> shRNA knockdown SH-SY5Y cell and <i>Baz/dInsc/Pins</i> knockdown fly validation.       | 4  |
| <b>Appendix Fig S4.</b> <i>hINSC</i> transgenic fly mRNA and protein level validations.                                     | 5  |
| <b>Appendix Fig S5.</b> Schematic of a seamless editing knock-in strategy and sequence alignment of LGN binding domain.     | 6  |
| <b>Appendix Fig S6.</b> The expression pattern and protein localization of <i>Drosophila Inscuteable</i> in larval tissues. | 7  |
| <b>Appendix Fig S7.</b> The time-lapse imaging of the <i>Drosophila</i> walking behaviors.                                  | 8  |
| <b>Appendix Fig S8.</b> Feeding assay of Taxol feeding in different doses and genetic background.                           | 9  |
| <b>Appendix Table S1.</b> Nerve conduction studies of the patients carrying <i>INSC</i> p.Met70Arg.                         | 10 |
| <b>Appendix Table S2.</b> Bioinformatics analyses and filtering of the whole genome sequencing data.                        | 11 |
| <b>Appendix Table S3.</b> <i>Drosophila</i> stocks list.                                                                    | 12 |
| <b>Appendix Table S4.</b> <i>Drosophila</i> genotype and associated figures.                                                | 14 |
| <b>Appendix Table S5.</b> List of plasmids used in this study.                                                              | 18 |
| <b>Appendix Table S6.</b> List of primers used in this study.                                                               | 19 |
| <b>Appendix Table S7.</b> List of antibodies used in this study.                                                            | 21 |

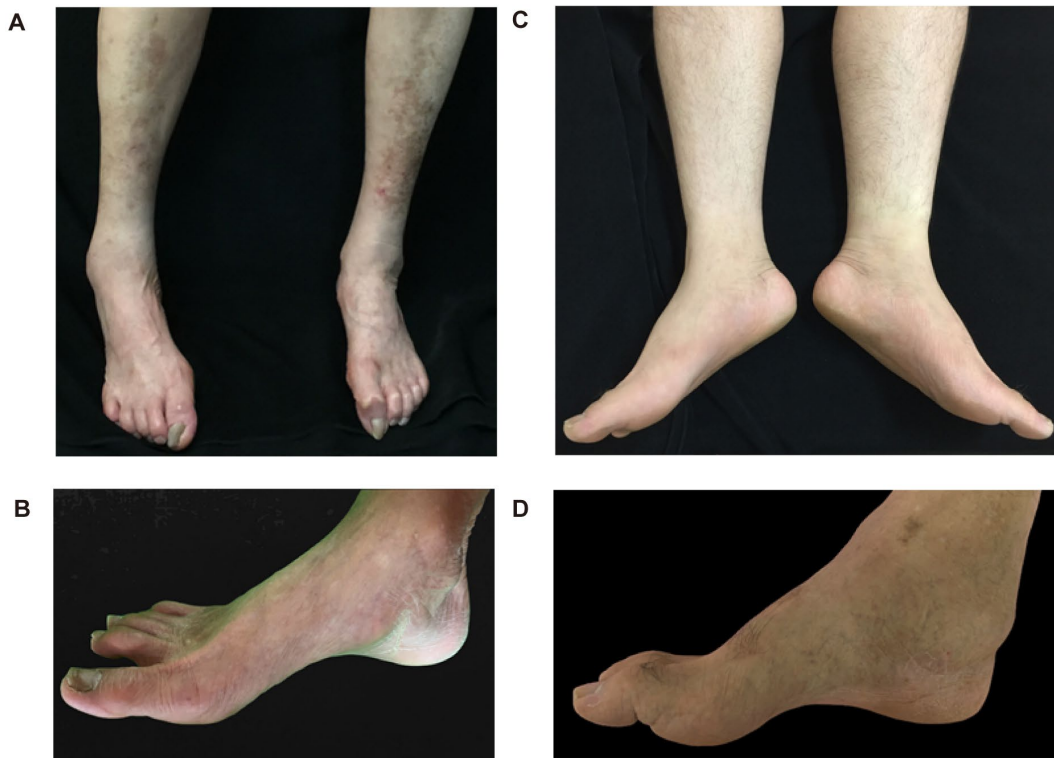

**Appendix Figure S1. Clinical pictures of the patients with *INSC* p.Met70Arg.**

A. Affected female II-2 aged 59 years, with muscle wasting below the knees.

B. Affected male II-3 aged 57, with pes cavus.

C. Affected male III-3 aged 30, with pes planus.

D. Affected male II-9 aged 49, with pes cavus.

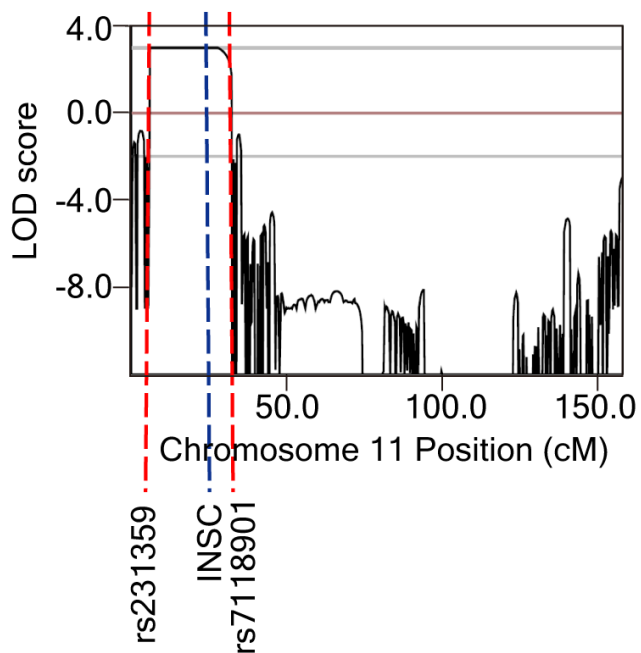

**Appendix Figure S2. Multipoint parametric linkage analysis of CMT2 in the family.**

Multipoint parametric linkage analysis revealed three loci with a LOD score of approximately 3, including chr11:2694606-19743250 (GrCh37; Zmax 3.01), chr4:442021-6213622 (Zmax 3), and chr16:72022941-77978326 (Zmax 2.97). The red dotted lines define the flanking markers of the linkage peaks. The blue dotted line shows the location of the *INSC* gene within the chromosome 11 linkage region.

### hINSC shRNA SH-SY5Y cell knockdown validation

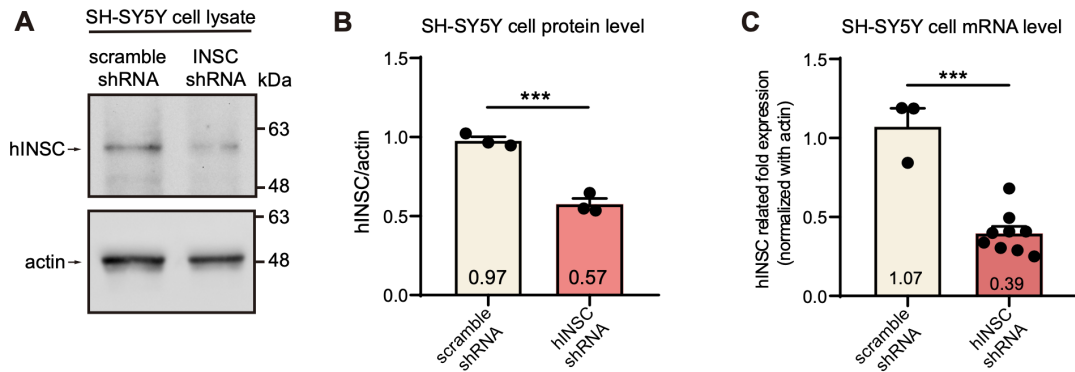

### Baz/dInsc/Pins Knockdown flies validation

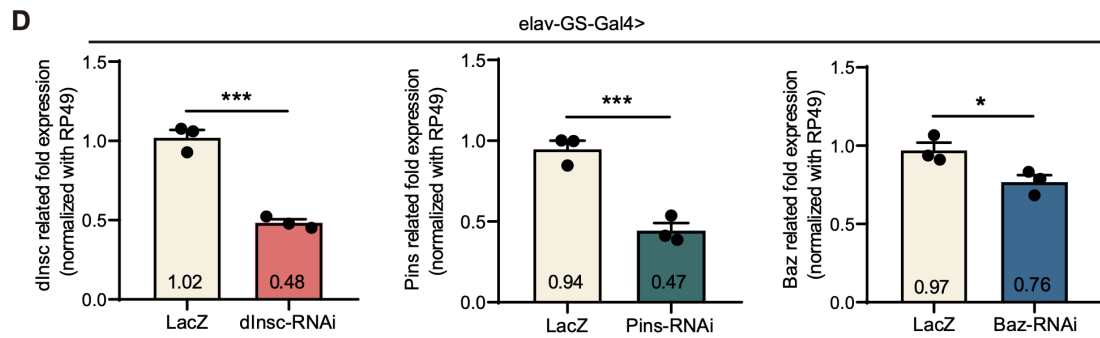

## Appendix Fig S3. *hINSC* shRNA knockdown SH-SY5Y cell and *Baz/dInsc/*

### *Pins* knockdown fly validation

- Representative blot from 3 independent western blottings of SH-SY5Y cell extracts of *hINSC*-shRNA and scramble shRNA control.
  - Quantification of (A).
  - Relative *hINSC* mRNA abundance in SH-SY5Y cell extracts of *hINSC*-shRNA and scramble shRNA control.
  - Relative mRNA abundance in whole fly extracts of *dInsc*, *Pins* and *Baz* RNAi flies driven by *elav-GS-Gal4*; n = 24 flies/genotype from 3 independent fly crosses.
- Data information: Error bars indicate mean  $\pm$  SEM. Statistical analysis was performed using two-tailed Student's t-test. \*P < 0.05, \*\*P < 0.01, \*\*\*P < 0.001.

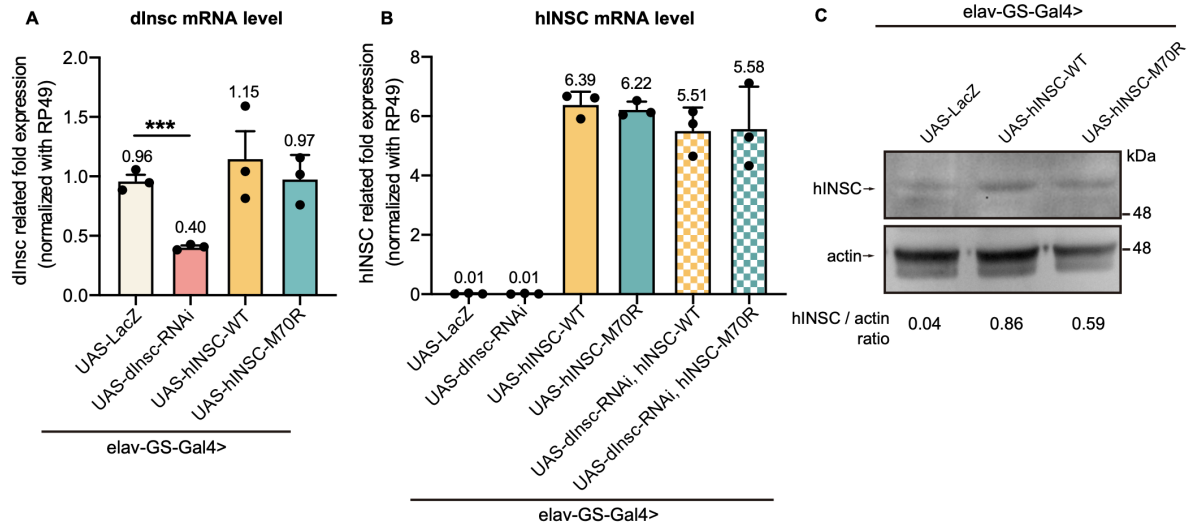

### Appendix Fig S4. *hINSC* transgenic fly mRNA and protein level validations

- A. Relative *dlncsc* mRNA abundance in whole fly extracts of the indicated UAS transgenes driven by *elav-GS-Gal4*; n = 12 flies/genotype from 3 independent fly crosses.
- B. Relative *hINSC* mRNA abundance in whole fly extracts of the above indicated groups driven by *elav-GS-Gal4*; n = 12 flies/genotype from 3 independent fly crosses.
- C. Representative western blotting of whole fly extracts from UAS-*hINSC*<sup>WT</sup> and UAS-*hINSC*<sup>M70R</sup>, and UAS-*LacZ* control, driven by *elav-GS-Gal4*; n = 5 flies/genotypes.
- Data information: Error bars indicate mean  $\pm$  SEM. Statistical analysis was performed using two-tailed Student's t-test. \*P < 0.05, \*\*P < 0.01, \*\*\*P < 0.001.

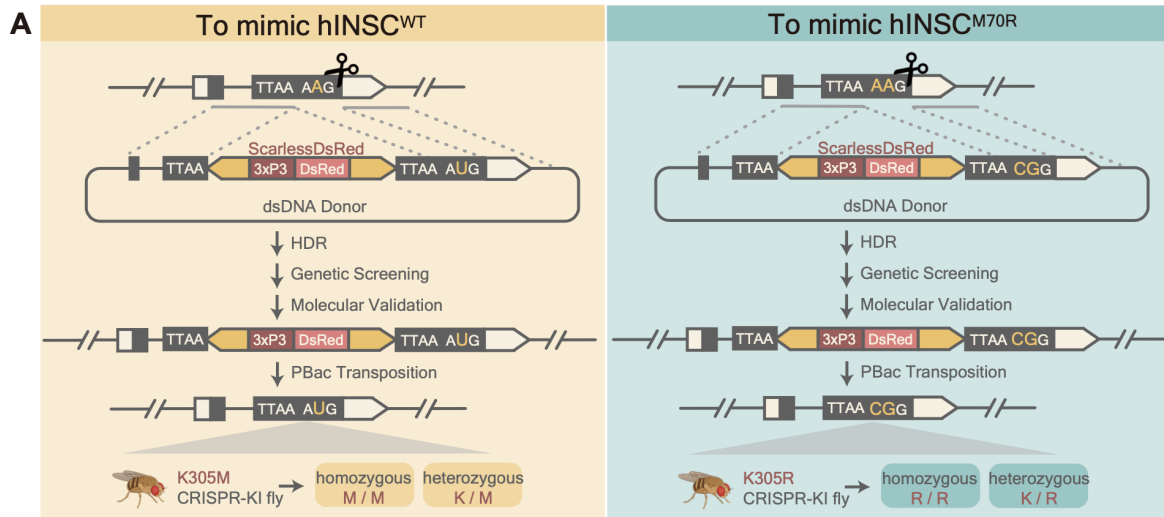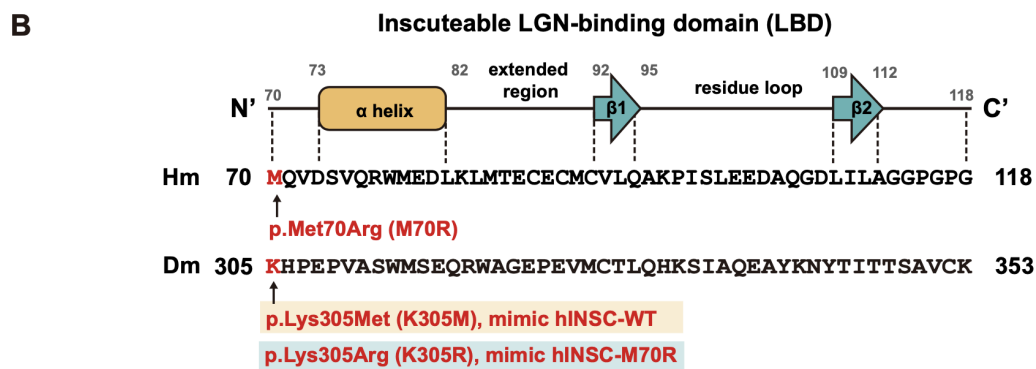

**Appendix Fig S5. Schematic of a seamless editing knock-in strategy and sequence alignment of LGN binding domain.**

- A. Schematic presentation of a seamless editing knock-in strategy to generate two alleles, *dInsc<sup>K305M</sup>* and *dInsc<sup>K305R</sup>* with CRISPR-Cas9 technique to mimic *hINSC<sup>WT</sup>* and *hINSC<sup>M70R</sup>*, respectively.
- B. Sequence alignment of human and flies LGN-binding domain of INSC.

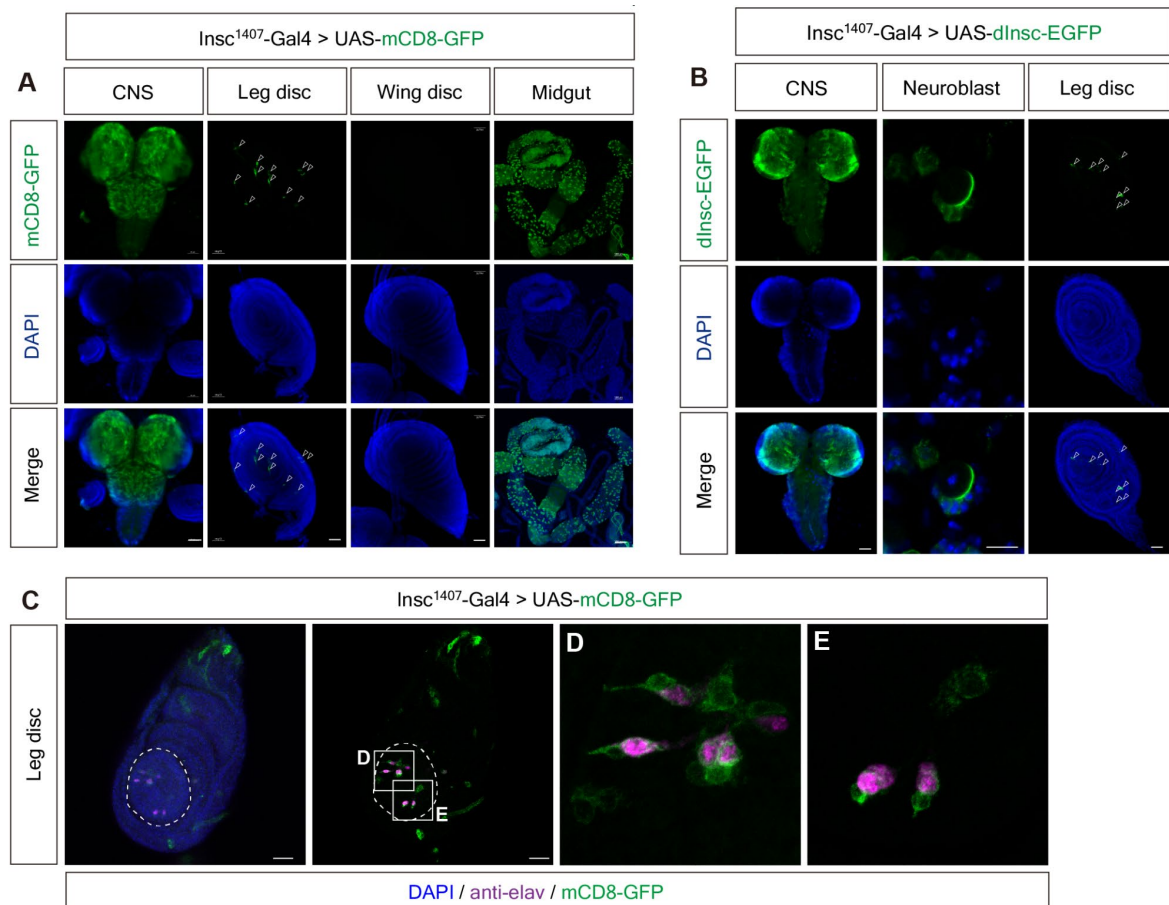

**Appendix Fig S6. The expression pattern and protein localization of *Drosophila Inscuteable* in larval tissues.**

A. Representative images of CNS, leg disc, wing disc and midgut labeled with *mCD8-GFP* (green) under the control of *dInsc<sup>1407</sup>-Gal4* in third instar larvae. (Blue) DAPI staining. Scale bars: 50, 50, 50 and 100  $\mu\text{m}$  from left to right.

B. Representative confocal images of *dInsc-EGFP* (*dInsc<sup>1407</sup>-Gal4*>*UAS-dInsc-EGFP*) in CNS, neuroblast, and leg disc of third instar larvae. Green indicates *dInsc-EGFP*. (Blue) DAPI staining. Scale bars: 50, 100 and 50  $\mu\text{m}$  from left to right.

C-E. Representative confocal images of leg disc labeled with *mCD8-GFP* (green) under the control of *dInsc<sup>1407</sup>-Gal4* in third instar larvae. (Blue) DAPI staining; (magenta) anti-elav immunofluorescence. Scale bars: 50  $\mu\text{m}$ .

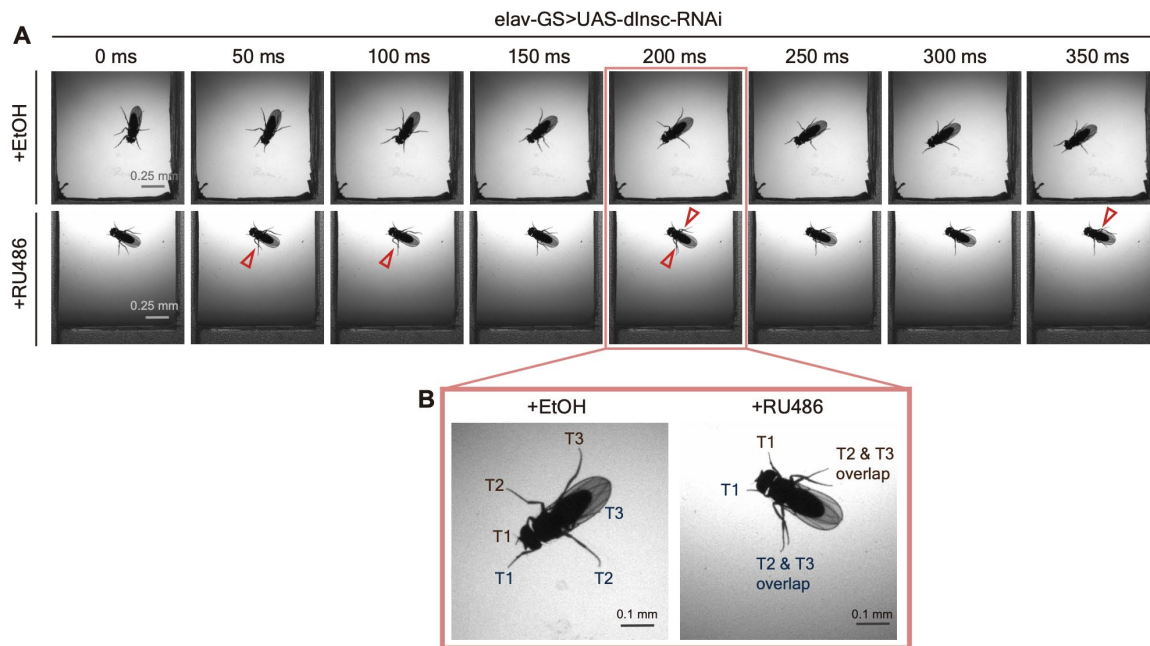

**Appendix Fig S7. The time-lapse imaging of the *Drosophila* walking behaviors**

- A. Snapshots from *Drosophila in vivo* imaging dataset for *elav-GS>UAS-dInsc-RNAi* flies fed with RU486 (bottom row), compared with the solvent (EtOH)-fed controls (top row). The interval of time-lapse is 50 ms. Scale bars: 0.25 mm.
- B. Magnified images of (A). The RU486-fed flies, but not in solvent-feeding control, showed overlapped T2 and T3 legs (red arrowheads in (A)). Scale bars: 0.1 mm.



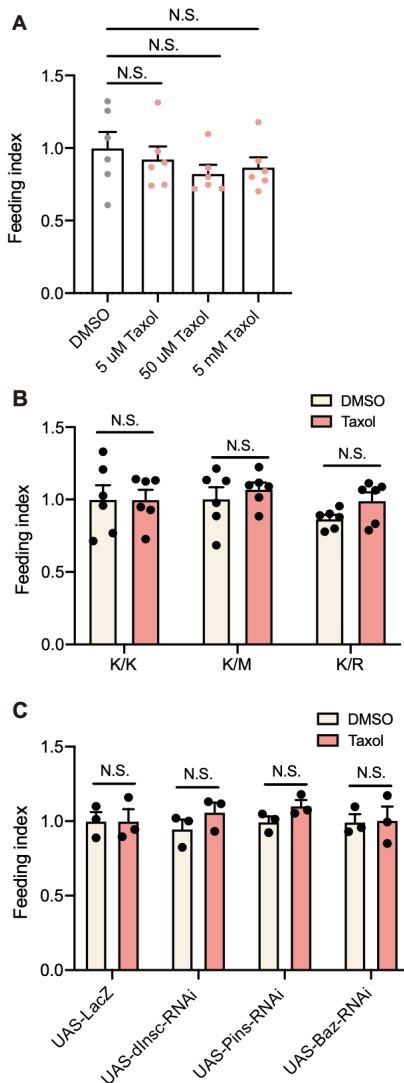

### Appendix Fig S8. Feeding assay of Taxol feeding in different doses and genetic background

- Feeding index of *W1118* (*K/K*) flies fed with different doses (5  $\mu$ M, 50  $\mu$ M and 5 mM) of Taxol; 24 flies/genotypes from 6 independent technical replicates.
- Feeding index of *K/K*, *K/M*, *K/R* flies fed with 50  $\mu$ M Taxol; 24 flies/genotypes from 6 independent technical replicates.
- Feeding index of *UAS-LacZ*, *UAS-dInsc-RNAi*, *UAS-Pins-RNAi* and *UAS-Baz-RNAi* flies driven by *elav-GS-Gal4*. The flies were fed with 50  $\mu$ M Taxol; 12 flies/genotypes from 3 independent technical replicates.

Data information: Error bars indicate mean  $\pm$  SEM. Statistical analysis was performed using two-tailed Student's t-test. \* $P < 0.05$ , \*\* $P < 0.01$ , \*\*\* $P < 0.001$ .

**Appendix Table S1 Nerve conduction studies of the patients carrying *INSC* p.Met70Arg**

| Patient              | Age at exam<br>(y) | Motor nerve conduction studies |            |                |           |              |            | Sensory nerve conduction studies |             |             |
|----------------------|--------------------|--------------------------------|------------|----------------|-----------|--------------|------------|----------------------------------|-------------|-------------|
|                      |                    | Median nerve                   |            | Peroneal nerve |           | Tibial nerve |            | Median nerve                     |             | Sural nerve |
|                      |                    | CV, m/s                        | CMAP, mV   | CV, m/s        | CMAP, mV  | CV, m/s      | CMAP, mV   | CV, m/s                          | SNAP, uV    | CV, m/s     |
| II-2                 | 59                 | 53.9                           | 6          | 37.6           | 0.3       | NR           | NR         | NR                               | NR          | NR          |
| II-3                 | 57                 | 44.4                           | 4.4        | ND             | ND        | ND           | ND         | NR                               | NR          | ND          |
| II-8                 | 52                 | 56.6                           | 4.7        | 45             | 2.6       | 42.2         | 2.0        | NR                               | NR          | NR          |
| II-9                 | 49                 | 51.5                           | 7          | 38             | 3.9       | 36.8         | 4.4        | 45.2                             | 6           | NR          |
| III-3                | 30                 | 55.5                           | 12.2       | 39.6           | 2.1       | 40.1         | 1.4        | NR                               | NR          | NR          |
| III-7                | 25                 | 51.3                           | 2.7        | 43.3           | 3.0       | 31.7         | 1.6        | NR                               | NR          | NR          |
| III-8                | 22                 | 54.5                           | 5          | 41.7           | 0.7       | 36.8         | 0.7        | NR                               | NR          | NR          |
| III-10               | 21                 | 49                             | 15.6       | 41.1           | 1.8       | 39.3         | 1          | NR                               | NR          | NR          |
| Controls (mean ± SD) |                    | 58.6 ± 4                       | 12.0 ± 3.9 | 48.8 ± 3.9     | 6.5 ± 2.9 | 49.6 ± 4.5   | 14.1 ± 4.5 | 56 ± 9                           | 37.6 ± 16.4 | 48.3 ± 10.1 |

Control values are based on a previously published report.<sup>ref</sup>

CV = conduction velocity; CMAP = compound motor action potential; SNAP = sensory action potential; NR = no response; ND = not done; SD = standard deviation.

Ref: Lin KP, Chan MH, Wu ZA. Nerve conduction studies in healthy Chinese: correlation with age, sex, height and skin temperature. *Zhonghua Yi Xue Za Zhi* (Taipei) 1993;52:293-297.

**Appendix Table S2 Bioinformatics analyses and filtering of the whole genome sequencing data**

| Filtering criteria                                          | Affected individuals with CMT |                                      |
|-------------------------------------------------------------|-------------------------------|--------------------------------------|
|                                                             | III-3 (S009)                  | III-8 (Q217)                         |
| Total bases sequenced by whole genome sequencing (Mbases)   | 118,721                       | 120,758                              |
| Average depth in targeted region (x)                        | 37.2                          | 38                                   |
| Percentage of >10x coverage in targeted region (%)          | 99.5                          | 99.6                                 |
| Heterozygous variants                                       | 30,671                        | 34,709                               |
| Shared heterozygous variants in affected individuals        |                               | 14824                                |
| Variants not present in 1517 Taiwan biobank control genomes |                               | 82                                   |
| Variants altering coding sequences                          |                               | 1                                    |
| Variants completely segregated with CMT phenotype           |                               | 1 ( <i>INSC</i> c.209T>G p.Met70Arg) |

CMT: Charcot-Marie-Tooth disease

**Appendix Table S3 *Drosophila* stocks**

| <b>Name</b>                                 | <b>Genotype</b>                                                                                                                                                                          | <b>Source</b> |
|---------------------------------------------|------------------------------------------------------------------------------------------------------------------------------------------------------------------------------------------|---------------|
| Insc <sup>1407</sup> -Gal4                  | <i>w</i> [*]; <i>P</i> { <i>w</i> [+ <i>mW.hs</i> ]= <i>GawB</i> } <i>insc</i> [ <i>Mz1407</i> ]                                                                                         | BDSC_8751     |
| UAS-dInsc-EGFP                              | <i>w</i> [*]; <i>P</i> { <i>UAS-dInsc.EGFP</i> } <i>2</i>                                                                                                                                | This study    |
| UAS-mCD8-GFP                                | <i>y</i> [1] <i>w</i> [*]; <i>Pin</i> [ <i>Yt</i> ]/ <i>CyO</i> ; <i>P</i> { <i>w</i> [+ <i>mC</i> ]= <i>UAS-mCD8::GFP.L</i> } <i>LL6</i>                                                | BDSC_5130     |
| elav-GS-Gal4                                | <i>y</i> [1] <i>w</i> [*]; <i>P</i> { <i>w</i> [+ <i>mC</i> ]= <i>elav-Switch.O</i> } <i>GSG301</i>                                                                                      | BDSC_43642    |
| UAS-dInsc-RNAi                              | <i>y</i> [1] <i>v</i> [1]; <i>P</i> { <i>y</i> [+ <i>t7.7</i> ]<br><i>v</i> [+ <i>t1.8</i> ]= <i>TRiP.HMJ22537</i> } <i>attP40/CyO</i>                                                   | BDSC_60358    |
| UAS-w-RNAi                                  | <i>y</i> [1] <i>v</i> [1]; <i>P</i> { <i>y</i> [+ <i>t7.7</i> ]<br><i>v</i> [+ <i>t1.8</i> ]= <i>TRiP.HMS00017</i> } <i>attP2</i>                                                        | BDSC_33623    |
| UAS-LacZ                                    | <i>y</i> [1] <i>w</i> [1118]; <i>P</i> { <i>w</i> [+ <i>mC</i> ]= <i>UAS-lacZ.Exel</i> } <i>3</i>                                                                                        | BDSC_8530     |
| UAS-Pins-RNAi                               | <i>y</i> [1] <i>sc</i> [*] <i>v</i> [1] <i>sev</i> [21]; <i>P</i> { <i>y</i> [+ <i>t7.7</i> ]<br><i>v</i> [+ <i>t1.8</i> ]= <i>TKO.GS00670</i> } <i>attP40</i>                           | BDSC_77190    |
| UAS-Bazooka-RNAi                            | <i>y</i> [1] <i>v</i> [1]; <i>P</i> { <i>y</i> [+ <i>t7.7</i> ]<br><i>v</i> [+ <i>t1.8</i> ]= <i>TRiP.JF01079</i> } <i>attP2</i>                                                         | BDSC_31523    |
| W1118                                       | <i>W</i> [1118]                                                                                                                                                                          | BDSC_3605     |
| Insc <sup>InSITE</sup> -Gal4                | <i>w</i> [1118]; <i>PBac</i> { <i>w</i> [+ <i>mC</i> ]= <i>IT.GAL4</i> } <i>insc</i> [1235- <i>G4</i> ] <i>skt</i> [1235- <i>G4</i> ]/ <i>CyO</i>                                        | BDSC_65626    |
| UAS-dInsc-WT                                | <i>w</i> [*]; <i>P</i> { <i>w</i> [+ <i>mC</i> ]= <i>UAS-insc.K</i> } <i>3</i>                                                                                                           | BDSC_39676    |
| Iav-Gal4                                    | <i>w</i> [*]; <i>P</i> { <i>w</i> [+ <i>mC</i> ]= <i>iav-GAL4.K</i> } <i>3</i>                                                                                                           | BDSC_52273    |
| OK371-Gal4                                  | <i>w</i> [1118];<br><i>P</i> { <i>w</i> [+ <i>mW.hs</i> ]= <i>GawB</i> } <i>VGlut</i> [ <i>OK371</i> ]                                                                                   | BDSC_26160    |
| Insc <sup>P49</sup>                         | <i>insc</i> [ <i>P49</i> ]/ <i>CyO</i>                                                                                                                                                   | DGRC_108467   |
| UAS-hINSC-WT-FLAG                           | <i>w</i> [*]; <i>P</i> { <i>UAS-hINSC-WT.FLAG</i> } <i>3</i>                                                                                                                             | This study    |
| UAS-hINSC-M70R-FLAG                         | <i>w</i> [*]; <i>P</i> { <i>UAS-hINSC-M70R.FLAG</i> } <i>3</i>                                                                                                                           | This study    |
| nan-Gal4                                    | <i>w</i> [*]; <i>P</i> { <i>w</i> [+ <i>mC</i> ]= <i>nan-GAL4.K</i> } <i>2</i>                                                                                                           | BDSC_24903    |
| UAS-dPins-mCherry                           | <i>w</i> [*]; <i>P</i> { <i>UAS-dPins-mCherry</i> } <i>3</i>                                                                                                                             | This study    |
| UAS-hNSC-WT-EGFP                            | <i>w</i> [*]; <i>P</i> { <i>UAS-hINSC-WT.EGFP</i> } <i>3</i>                                                                                                                             | This study    |
| UAS-hNSC-M70R-EGFP                          | <i>w</i> [*]; <i>P</i> { <i>UAS-hINSC-M70R.EGFP</i> } <i>3</i>                                                                                                                           | This study    |
| UAS-Bazooka-mCherry                         | <i>w</i> [*]; <i>P</i> { <i>y</i> [+ <i>t7.7</i> ] <i>w</i> [+ <i>mC</i> ]= <i>UAS-baz::mCherry</i> } <i>attP40/CyO</i>                                                                  | BDSC_65844    |
| Insc <sup>1407</sup> -Gal4, UAS-tub-mCherry | <i>w</i> [*];<br><i>P</i> { <i>w</i> [+ <i>mW.hs</i> ]= <i>GawB</i> } <i>insc</i> [ <i>Mz1407</i> ]/ <i>CyO</i> ;<br><i>P</i> { <i>w</i> [+ <i>mC</i> ]= <i>UAS-ChRFP-Tub</i> } <i>3</i> | BDSC_25773    |
| Elav-Gal4                                   | <i>P</i> { <i>w</i> [+ <i>mC</i> ]= <i>GAL4-elav.L</i> } <i>2/CyO</i>                                                                                                                    | BDSC_8765     |
| PiggyBac                                    | <i>w</i> [*];<br><i>PBac</i> { <i>GFP</i> [ <i>ECFP.3xP3</i> ]= <i>5pBlueEye.hsp70-</i>                                                                                                  | BDSC_32174    |

|                                                                    |                       |            |
|--------------------------------------------------------------------|-----------------------|------------|
|                                                                    | <i>PBac\T\}Dmel2</i>  |            |
| CRISPR dInsc<br>K305M KI                                           | <i>dInsc-K305M-KI</i> | This study |
| CRISPR dInsc K305R<br>KI                                           | <i>dInsc-K305R-KI</i> | This study |
| UAS-MTDS<br>( <u>microtubule-</u><br><u>destabilizing system</u> ) | <i>w[*];;UAS-MTDS</i> | This study |

**Appendix Table S4 *Drosophila* genotype and associated figures**

| <b>Figures</b> | <b>Abbreviated genotype</b>                                | <b>Full genotype</b>                                                                                                            |
|----------------|------------------------------------------------------------|---------------------------------------------------------------------------------------------------------------------------------|
| Fig 2A         | <i>elav-GS-Gal4&gt;UAS-mCD8-GFP</i>                        | <i>w[*]; +/+; P{w[+mC]=elav-Switch.O}GSG301/P{w[+mC]=UAS-mCD8::GFP.L}LL6</i>                                                    |
| Fig 2A         | <i>elav-GS-Gal4&gt;UAS-dInsc-RNAi</i>                      | <i>w[*]; P{y[+t7.7] v[+t1.8]=TRiP.HMJ22537}2/+; P{w[+mC]=elav-Switch.O}GSG301</i>                                               |
| Fig 2A         | <i>elav-GS-Gal4&gt;UAS-w-RNAi</i>                          | <i>w[*]; +/+; P{w[+mC]=elav-Switch.O}GSG301/P{y[+t7.7] v[+t1.8]=TRiP.HMS00017}3</i>                                             |
| Fig 2A         | <i>elav-GS-Gal4&gt;UAS-Pins-RNAi</i>                       | <i>w[*]; P{y[+t7.7] v[+t1.8]=TKO.GS00670}2/+; P{w[+mC]=elav-Switch.O}GSG301/+</i>                                               |
| Fig 2A         | <i>elav-GS-Gal4&gt;UAS-Baz-RNAi</i>                        | <i>w[*]; +/+; P{w[+mC]=elav-Switch.O}GSG301/P{y[+t7.7] v[+t1.8]=TRiP.JF01079}3</i>                                              |
| Fig 2B         | <i>dInsc-InSITE-Gal4&gt;UAS-dInsc-WT</i>                   | <i>w[*]; PBac{w[+mC]=IT.GAL4}insc[1235-G4]sktl[1235-G4]/+; P{w[+mC]=UAS-insc.K}3/+</i>                                          |
| Fig 2B         | <i>dInsc-InSITE-Gal4 / +</i>                               | <i>w[*]; PBac{w[+mC]=IT.GAL4}insc[1235-G4]sktl[1235-G4]/+</i>                                                                   |
| Fig 2B         | <i>dInsc-InSITE-Gal4&gt;UAS-hINSC-WT</i>                   | <i>w[*]; PBac{w[+mC]=IT.GAL4}insc[1235-G4]sktl[1235-G4]/+; P{UAS-hINSC-WT.FLAG}3/+</i>                                          |
| Fig 2B         | <i>dInsc-InSITE-Gal4&gt;UAS-hINSC-M70R</i>                 | <i>w[*]; PBac{w[+mC]=IT.GAL4}insc[1235-G4]sktl[1235-G4]/+; P{UAS-hINSC-M70R.FLAG}3/+</i>                                        |
| Fig 2B         | <i>dInsc-InSITE-Gal4&gt;UAS-dInsc-RNAi</i>                 | <i>w[*]; PBac{w[+mC]=IT.GAL4}insc[1235-G4]sktl[1235-G4]/P{y[+t7.7] v[+t1.8]=TRiP.HMJ22537}attP40</i>                            |
| Fig 2B         | <i>dInsc-InSITE-Gal4&gt;UAS-dInsc-RNAi, UAS-hINSC-WT</i>   | <i>w[*]; PBac{w[+mC]=IT.GAL4}insc[1235-G4]sktl[1235-G4]/P{y[+t7.7] v[+t1.8]=TRiP.HMJ22537}attP40; P{UAS-hINSC-WT.FLAG}3/+</i>   |
| Fig 2B         | <i>dInsc-InSITE-Gal4&gt;UAS-dInsc-RNAi, UAS-hINSC-M70R</i> | <i>w[*]; PBac{w[+mC]=IT.GAL4}insc[1235-G4]sktl[1235-G4]/P{y[+t7.7] v[+t1.8]=TRiP.HMJ22537}attP40; P{UAS-hINSC-M70R.FLAG}3/+</i> |
| Fig 2D         | <i>dInsc K305M/+</i>                                       | <i>w[*]; dInsc K305M-KI/+</i>                                                                                                   |

|                  |                                       |                                                                           |
|------------------|---------------------------------------|---------------------------------------------------------------------------|
| Fig 2D           | <i>dInsc K305M/dInsc K305M</i>        | w[*];dInsc K305M-KI/dInsc K305M-KI                                        |
| Fig 2D           | <i>dInsc K305R/+</i>                  | w[*];dInsc K305R-KI/+                                                     |
| Fig 2D           | <i>dInsc K305R/dInsc K305R</i>        | w[*];dInsc K305R-KI/dInsc K305R-KI                                        |
| Fig 2E, Fig EV1A | <i>insc1407-Gal4&gt;UAS-mCD8-GFP</i>  | w[*]; P{w[+mW.hs]=GawB}insc[Mz1407]/+ ; P{w[+mC]=UAS-mCD8::GFP.L}LL6/+    |
| Fig 2I           | <i>Iav-Gal4 &gt; UAS-mCD8-GFP</i>     | w[*];+/+; P{w[+mC]=iav-GAL4.K}3/P{w[+mC]=UAS-mCD8::GFP.L}LL6              |
| Fig 2I           | <i>Iav-Gal4 &gt; UAS-dInsc-RNAi</i>   | w[*];P{y[+t7.7] v[+t1.8]=TRiP.HMJ22537}2/+; P{w[+mC]=iav-GAL4.K}3/+       |
| Fig 2I           | <i>Iav-Gal4 &gt; UAS-Baz-RNAi</i>     | w[*];+/+; P{w[+mC]=iav-GAL4.K}3/P{y[+t7.7] v[+t1.8]=TRiP.JF01079}3        |
| Fig 2I           | <i>Iav-Gal4 &gt; UAS-Pins-RNAi</i>    | w[*];+/P{y[+t7.7] v[+t1.8]=TKO.GS00670}2;P{w[+mC]=iav-GAL4.K}3/+          |
| Fig 2J-N         | <i>elav-GS-Gal4&gt;UAS-dInsc-RNAi</i> | w[*];P{y[+t7.7] v[+t1.8]=TRiP.HMJ22537}2/+; P{w[+mC]=elav-Switch.O}GSG301 |
| Fig 3D&E         | <i>nan-Gal4&gt;UAS-w-RNAi</i>         | w[*]; P{w[+mC]=nan-GAL4.K}2/+;P{y[+t7.7] v[+t1.8]=TRiP.HMS00017}3/+       |
| Fig 3D&E         | <i>nan-Gal4&gt;UAS-dInsc-RNAi</i>     | w[*]; P{w[+mC]=nan-GAL4.K}2/P{y[+t7.7] v[+t1.8]=TRiP.HMJ22537}2;+/+       |
| Fig 3D&E         | <i>nan-Gal4&gt;UAS-Pins-RNAi</i>      | w[*]; P{w[+mC]=nan-GAL4.K}2/P{y[+t7.7] v[+t1.8]=TKO.GS00670}2;+/+         |
| Fig 3D&E         | <i>nan-Gal4&gt;UAS-Baz-RNAi</i>       | w[*]; P{w[+mC]=nan-GAL4.K}2/+;P{y[+t7.7] v[+t1.8]=TRiP.JF01079}3/+        |
| Fig 3F, Fig EV3A | <i>dInsc K305M/+</i>                  | w[*];dInsc K305M-KI/+                                                     |
| Fig 3F, Fig EV3A | <i>dInsc K305M/dInsc K305M</i>        | w[*];dInsc K305M-KI/dInsc K305M-KI                                        |
| Fig 3F           | <i>dInsc K305R/+</i>                  | w[*];dInsc K305R-KI/+                                                     |
| Fig 3F, Fig EV3A | <i>dInsc K305R/dInsc K305R</i>        | w[*];dInsc K305R-KI/dInsc K305R-KI                                        |
| Fig 3G           | <i>dInsc K305M/+</i>                  | w[*];dInsc K305M-KI/+                                                     |

|                  |                                                                    |                                                                                                        |
|------------------|--------------------------------------------------------------------|--------------------------------------------------------------------------------------------------------|
| Fig 3G, Fig EV3B | <i>dInsc K305M; elav-Gal4&gt;UAS-hINSC-WT</i>                      | w[*];dInsc K305M-KI/P {w[+mC]=GAL4-elav.L}2;P {UAS-hINSC-WT.FLAG}3/+                                   |
| Fig 3G, Fig EV2B | <i>dInsc K305M; elav-Gal4&gt;UAS-hINSC-M70R</i>                    | w[*];dInsc K305M-KI/P {w[+mC]=GAL4-elav.L}2;P {UAS-hINSC-M70R.FLAG}3/+                                 |
| Fig 3G, Fig EV2B | <i>dInsc K305M; elav-Gal4&gt;UAS-dInsc-WT</i>                      | w[*];dInsc K305M-KI/P {w[+mC]=GAL4-elav.L}2;P {w[+mC]=UAS-insc.K}3/+                                   |
| Fig 3G, Fig EV3B | <i>dInsc K305R/+</i>                                               | w[*];dInsc K305R-KI/+                                                                                  |
| Fig 3G, Fig EV2B | <i>dInsc K305R; elav-Gal4&gt;UAS-hINSC-WT</i>                      | w[*];dInsc K305R-KI/P {w[+mC]=GAL4-elav.L}2;P {UAS-hINSC-WT.FLAG}3/+                                   |
| Fig 3G, Fig EV2B | <i>dInsc K305R; elav-Gal4&gt;UAS-hINSC-M70R</i>                    | w[*];dInsc K305R-KI/P {w[+mC]=GAL4-elav.L}2;P {UAS-hINSC-M70R.FLAG}3/+                                 |
| Fig 3G, Fig EV2B | <i>dInsc K305R; elav-Gal4&gt;UAS-dInsc-WT</i>                      | w[*];dInsc K305R-KI/P {w[+mC]=GAL4-elav.L}2;P {w[+mC]=UAS-insc.K}3/+                                   |
| Fig 4C-F         | <i>nan-Gal4&gt;UAS-hINSC-WT, UAS-Pins-mCherry</i>                  | w[*]; P {w[+mC]=nan-GAL4.K}2/+;P {UAS-hINSC-WT.FLAG}3/P {UAS-dPins-mCherry}3                           |
| Fig 4C-F         | <i>nan-Gal4&gt;UAS-hINSC-M70R, UAS-Pins-mCherry</i>                | w[*]; P {w[+mC]=nan-GAL4.K}2/+;P {UAS-hINSC-M70R.FLAG}3/P {UAS-dPins-mCherry}3                         |
| Fig 4K-L         | <i>iav-Gal4&gt;UAS-hINSC-WT, UAS-Baz-mCherry</i>                   | w[*]; P {w[+mC]=iav-GAL4.K}2/P {y[+t7.7]w[+mC]=UAS-baz::mCherry}2;P {UAS-hINSC-WT.FLAG}3/+             |
| Fig 4K-L         | <i>iav-Gal4&gt;UAS-hINSC-M70R, UAS-Baz-mCherry</i>                 | w[*]; P {w[+mC]=iav-GAL4.K}2/P {y[+t7.7]w[+mC]=UAS-baz::mCherry}2;P {UAS-hINSC-M70R.FLAG}3/+           |
| Fig 5A-C         | <i>Insc1407-Gal4&gt; UAS-tubulin-mCherry, UAS-w-RNAi</i>           | w[*]; P {w[+mW.hs]=GawB} insc[Mz1407]/+; P {w[+mC]=UAS-ChRFP-Tub}3/P {y[+t7.7]v[+t1.8]=TRiP.HMS00017}3 |
| Fig 5A-C         | <i>Insc1407-Gal4&gt; UAS-tubulin-mCherry, UAS-dInsc-RNAi</i>       | w[*]; P {w[+mW.hs]=GawB} insc[Mz1407]/P {y[+t7.7]v[+t1.8]=TRiP.HMJ22537}2; P {w[+mC]=UAS-ChRFP-Tub}3/+ |
| Fig 5A-C         | <i>Insc1407-Gal4&gt; UAS-tubulin-mCherry, UAS-dInsc-RNAi, UAS-</i> | w[*]; P {w[+mW.hs]=GawB} insc[Mz1407]/P {y[+t7.7]v[+t1.8]=TRiP.HMJ22537}2; P {w[+mC]=UAS-              |



|                  |                                                                                                      |                                                                                                                                                      |
|------------------|------------------------------------------------------------------------------------------------------|------------------------------------------------------------------------------------------------------------------------------------------------------|
|                  | <i>hINSC-WT</i>                                                                                      | ChRFP-Tub <sup>3</sup> /P{UAS-hINSC-WT.FLAG <sup>3</sup> }                                                                                           |
| Fig 5A-C         | <i>Insc1407-Gal4</i> > UAS- <i>tubulin-mCherry</i> , UAS- <i>dInsc-RNAi</i> , UAS- <i>hINSC-M70R</i> | w[*];<br>P{w[+mW.hs]=GawB}insc[Mz1407]/P{y[+t7.7]v[+t1.8]=TRiP.HMJ22537}2; P{w[+mC]=UAS-ChRFP-Tub <sup>3</sup> /P{UAS-hINSC-M70R.FLAG <sup>3</sup> } |
| Fig 5D&E         | <i>W1118</i>                                                                                         | w[1118]                                                                                                                                              |
| Fig 5D&E         | <i>dInsc K305M/+</i>                                                                                 | w[*];dInsc K305M-KI/+                                                                                                                                |
| Fig 5D&E         | <i>dInsc K305R/+</i>                                                                                 | w[*];dInsc K305R-KI/+                                                                                                                                |
| Fig 5F&G         | <i>Insc1407-Gal4</i> > UAS- <i>tubulin-mCherry</i> , UAS- <i>dInsc-RNAi</i>                          | w[*];<br>P{w[+mW.hs]=GawB}insc[Mz1407]/P{y[+t7.7]v[+t1.8]=TRiP.HMJ22537}2; P{w[+mC]=UAS-ChRFP-Tub <sup>3</sup> /+}                                   |
| Fig 5F&G         | <i>Insc1407-Gal4</i> > UAS- <i>tubulin-mCherry</i> , UAS- <i>Baz-RNAi</i>                            | w[*];<br>P{w[+mW.hs]=GawB}insc[Mz1407]/+;P{y[+t7.7]v[+t1.8]=TRiP.JF01079}3/P{w[+mC]=UAS-ChRFP-Tub <sup>3</sup> }                                     |
| Fig 5F&G         | <i>Insc1407-Gal4</i> > UAS- <i>tubulin-mCherry</i> , UAS- <i>Pins-RNAi</i>                           | w[*];<br>P{w[+mW.hs]=GawB}insc[Mz1407]/P{y[+t7.7]v[+t1.8]=TKO.GS00670}2;P{w[+mC]=UAS-ChRFP-Tub <sup>3</sup> /+}                                      |
| Fig 6A&D         | <i>dInsc K305M; Insc1407-Gal4</i> > UAS- <i>tubulin-mCherry</i>                                      | w[*];dInsc K305M-KI/P{w[+mW.hs]=GawB}insc[Mz1407];P{w[+mC]=UAS-ChRFP-Tub <sup>3</sup> /+}                                                            |
| Fig 6A&D         | <i>dInsc K305R; Insc1407-Gal4</i> > UAS- <i>tubulin-mCherry</i>                                      | w[*];dInsc K305R-KI/P{w[+mW.hs]=GawB}insc[Mz1407];P{w[+mC]=UAS-ChRFP-Tub <sup>3</sup> /+}                                                            |
| Fig 6H, Fig EV5A | <i>dInsc K305M/+</i>                                                                                 | w[*];dInsc K305M-KI/+                                                                                                                                |
| Fig 6H, Fig EV5A | <i>dInsc K305R/+</i>                                                                                 | w[*];dInsc K305R-KI/+                                                                                                                                |
| Fig EV4A         | <i>Insc1407-Gal4</i> > UAS- <i>tubulin-mCherry</i>                                                   | w[*]; P{w[+mW.hs]=GawB}insc[Mz1407]/+; P{w[+mC]=UAS-ChRFP-Tub <sup>3</sup> /+}                                                                       |
| Fig EV4B         | <i>Insc1407-Gal4</i> > UAS- <i>tubulin-mCherry</i> , UAS- <i>dInsc-RNAi</i>                          | w[*];<br>P{w[+mW.hs]=GawB}insc[Mz1407]/P{y[+t7.7]v[+t1.8]=TRiP.HMJ22537}2; P{w[+mC]=UAS-ChRFP-Tub <sup>3</sup> /+}                                   |

**Appendix Table S5 List of plasmids used in this study**

| <b>Name</b>                                             | <b>Source</b>                             |
|---------------------------------------------------------|-------------------------------------------|
| pUAS <sub>t</sub> -attB-hINSC <sup>WT</sup> -FLAG       | This study (FLAG tag fused to C terminus) |
| pUAS <sub>t</sub> -attB-UAS-hINSC <sup>M70R</sup> -FLAG | This study (FLAG tag fused to C terminus) |
| pUAS <sub>t</sub> -attB-UAS-hINSC <sup>WT</sup> -EGFP   | This study (EGFP fused to C terminus)     |
| pUAS <sub>t</sub> -attB-UAS-hINSC <sup>M70R</sup> -EGFP | This study (EGFP fused to C terminus)     |
| pUAS <sub>t</sub> -attB-UAS-dInsc-EGFP                  | This study (EGFP fused to C terminus)     |
| pUAS <sub>t</sub> -attB-UAS-Pins-mCherry                | This study (mCherry fused to C terminus)  |
| pFLAG-hINSC <sup>WT</sup>                               | This study (FLAG tag fused to C terminus) |
| pFLAG-hINSC <sup>M70R</sup>                             | This study (FLAG tag fused to C terminus) |
| pMyc-LGN                                                | This study (Myc tag fused to C terminus)  |
| pHA-PAR3                                                | This study (HA tag fused to C terminus)   |
| pBFv-U6.2                                               | Addgene #138400                           |
| pScarlessHD-DsRed                                       | Addgene #64703                            |

**Appendix Table S6 List of primers used in this study**

| <b>Quantitative real-time PCR primers</b> |                                                               |
|-------------------------------------------|---------------------------------------------------------------|
| <b>Gene</b>                               | <b>Primer sequence</b>                                        |
| <i>Human INSC</i>                         | fwd: ACAGTGCTGTCAGCAGGAACTC                                   |
|                                           | rev: TGAAGGCACCTCTCTGTGACTG                                   |
| <i>Human beta-Actin</i>                   | fwd: GCGTCGGTCAATTCAATCTT                                     |
|                                           | rev: AAGCTGCAACCTCTTCGTC                                      |
| <i>Fly Baz</i>                            | fwd: GACTCGGAGTTGGACTGATGG                                    |
|                                           | rev: CAGCGTTTGTACTGCCCTCT                                     |
| <i>Fly Insc</i>                           | fwd: GGCGGTTTCTATTCGAGCTTC                                    |
|                                           | rev: GATGCTGGCTGTCTTTGTGG                                     |
| <i>Fly Pins</i>                           | fwd: GCGGAGAATGTGTCCAGTTTG                                    |
|                                           | rev: GAGTGCGAAGATCCTCGGTTC                                    |
| <i>Fly RP49</i>                           | fwd: ACTTCATCCGCCACCAGTCG                                     |
|                                           | rev: CGGGTGCGCT] [TCGATCC                                     |
| <b>Site-Directed Mutagenesis primers</b>  |                                                               |
| <b>Gene</b>                               | <b>Primer sequence</b>                                        |
| <i>hINSC-M70R</i>                         | fwd: GCGGCTACACCTGAGGCAGGTGGACTCAGTC                          |
|                                           | rev: GACTGAGTCCACCTGCCTCAGGTGTAGCCGC                          |
| <b>Molecular cloning primers</b>          |                                                               |
| <b>Plasmid</b>                            | <b>Primer sequence</b>                                        |
| pUAS <sub>t</sub> -attB-UAS-dInsc-EGFP    | fwd (BglIII site):<br>ATTCGTTAACAGATCTATGTCCTTTCAGCGTAGC      |
|                                           | rev (XhoI site):<br>TAGAGGTACCCTCGAGTTACTTGTACAGCTCGTCC       |
| pUAS <sub>t</sub> -attB-UAS-dPins-mCherry | fwd (EcoRI site):<br>AGGGAATTGGGAATTCATGTCCTCGCTCTCTGCG       |
|                                           | rev (KpnI site):<br>AAAGATCCTCTAGAGGTACCTTACTTGTACAGCTCGTCCAT |

|                                              |                                                              |
|----------------------------------------------|--------------------------------------------------------------|
| pUAS <sub>t</sub> -attB-UAS-hINSC-WT-FLAG    | fwd (EcoRI site): CCCGAATTCCAAAATGAGACGGCCCCCTGGC            |
|                                              | rev (XhoI site): GGGCTCGAGCTACTTGTTCATCGTCGTC                |
| pUAS <sub>t</sub> -attB-UAS-hINSC-M70R-FLAG  | fwd (EcoRI site): CCCGAATTCCAAAATGAGACGGCCCCCTGGC            |
|                                              | rev (XhoI site): GGGCTCGAGCTACTTGTTCATCGTCGTC                |
| pUAS <sub>t</sub> -attB-UAS-hINSC-WT -EGFP   | fwd (KpnI site):<br>GTTTTGTGGGATCCGGTACCATGGTGAGCAAGGGCGAG   |
|                                              | rev (KpnI site):<br>AAAGATCCTCTAGAGGTACCTTACTTGTACAGCTCGTCCA |
| pUAS <sub>t</sub> -attB-UAS-hINSC-M70R -EGFP | fwd (KpnI site):<br>GTTTTGTGGGATCCGGTACCATGGTGAGCAAGGGCGAG   |
|                                              | rev (KpnI site):<br>AAAGATCCTCTAGAGGTACCTTACTTGTACAGCTCGTCCA |
| pFLAG-hINSC-WT                               | fwd (EcoRI site): AAATTGAATTCACCATGAGACGGCCCCC               |
|                                              | rev (BamHI site): CGCGGATCCCACAAAACCTCTCCTCC                 |
| pFLAG-hINSC-M70R                             | fwd (EcoRI site): AAATTGAATTCACCATGAGACGGCCCCC               |
|                                              | rev (BamHI site): CGCGGATCCCACAAAACCTCTCCTCC                 |

**Appendix Table S7 List of antibodies used in this study**

| <b>Name</b>                                  | <b>Source</b>                                         | <b>Identifier</b>                                                   | <b>concentration</b>       |
|----------------------------------------------|-------------------------------------------------------|---------------------------------------------------------------------|----------------------------|
| Rat anti-FLAG                                | Novus biologicals                                     | Novus Cat#<br>NBP1-06712;<br>RRID:AB_1625981                        | 1:500 (IF),<br>1:1000 (WB) |
| Mouse anti-DLG                               | DSHB                                                  | DSHB Cat# 4F3                                                       | 1:200 (IF)                 |
| Rabbit anti-HA                               | Abcam                                                 | Abcam Cat# ab9110;<br>RRID:AB_307019                                | 1:500 (IF),<br>1:1000 (WB) |
| Mouse anti-c-Myc                             | DSHB                                                  | DSHB Cat# 9E10;<br>RRID:AB_2266850                                  | 1:500 (IF),<br>1:1000 (WB) |
| Rat anti-alpha-tubulin                       | Abcam                                                 | Abcam Cat# ab6160;<br>RRID:AB_305328                                | 1:500 (IF)                 |
| Mouse anti-acetylated tubulin                | Sigma-Aldrich                                         | Sigma-Aldrich<br>Cat# T6793;<br>RRID:AB_477585                      | 1:500 (IF)                 |
| Rabbit anti- <i>Drosophila</i> Insc antibody | A gift from Dr. Hongyan Wang, Duke-NUS medical school | -                                                                   | 1:1000 (WB)                |
| Rabbit anti-human INSC antibody              | Invitrogen                                            | Thermo Fisher Scientific<br>Cat#PA5-58921                           | 1:1000 (WB)                |
| Mouse anti-actin                             | Biolegend                                             | Biolegend Cat#643807                                                | 1:10000 (WB)               |
| Alexa Fluor@-568 Phalloidin                  | Invitrogen                                            | Thermo Fisher Scientific<br>Cat#A12380                              | 1:500                      |
| Alexa Fluor@-488 anti-Mouse IgG              | Jackson ImmunoResearch Laboratories                   | Jackson ImmunoResearch Labs<br>Cat# 715-545-150;<br>RRID:AB_2340846 | 1:500                      |
