# Supplementary material for: A missense mutation in human INSC causes peripheral neuropathy
Source: PubMed Central journal article supplement (PMC11099080; doi:10.1038/s44321-024-00062-w), 2024-04-08
Supplement: 44321_2024_62_MOESM11_ESM.pdf [file 44321_2024_62_MOESM11_ESM.pdf]

## Expanded View Figures

**Figure EV1. Expression of *dInsc* in FeCO neuron and its role in inducing tubulin aggregation.**

(A) The patterns of UAS-*mCD8-GFP* driven by *dInsc*<sup>1407</sup>-Gal4 (left, same image in Fig. 2E) and *lav*-Gal4 (right) in the leg. Green indicates *mCD8-GFP* and magenta indicates auto-fluorescence of the cuticle. Scale bars: 50  $\mu$ m. (B) Representative confocal images of tubulin aggregation in the femur of 3-week-old *dInsc*<sup>1407</sup>-Gal4>UAS-*dInsc*-RNAi flies compared with UAS-*LacZ* control. Red indicates *tubulin-mCherry*. Scale bars: 50  $\mu$ m. (C, D) Three-dimensional imaging of the femur of (D) *dInsc*<sup>1407</sup>-Gal4>*dInsc*-RNAi compared with (C) control flies. The intercellular mCherry fluorescence shows tubulin aggregation between muscle fibers. Red labeled tubulin, cyan labeled phalloidin (muscle fibers), and green indicate the auto-fluorescence of the cuticle. Arrowheads indicate the aggregative tubulin. Scale bars: 5  $\mu$ m. (E) Representative confocal images of the adult brain of 3-week-old *dInsc*<sup>1407</sup>-Gal4>UAS-*dInsc*-RNAi compared with the UAS-*LacZ* control flies. Green indicates mCherry fluorescence. Magenta indicates anti-DLG. Scale bars: 50  $\mu$ m. (F) Representative confocal images of tubulin aggregation in the FeCO neuron and the femur of 3-week-old *dInsc*<sup>1407</sup>-Gal4>*dInsc*-RNAi flies, compared with the control (UAS-*lacZ*) and the rescue (*hINSC*<sup>WT</sup> and *hINSC*<sup>M70R</sup>) groups. Red indicates tubulin tracker signals. Green indicates the auto-fluorescence of cuticles. The FeCO neurons are encircled by the dashed line. Scale bars: 5  $\mu$ m.

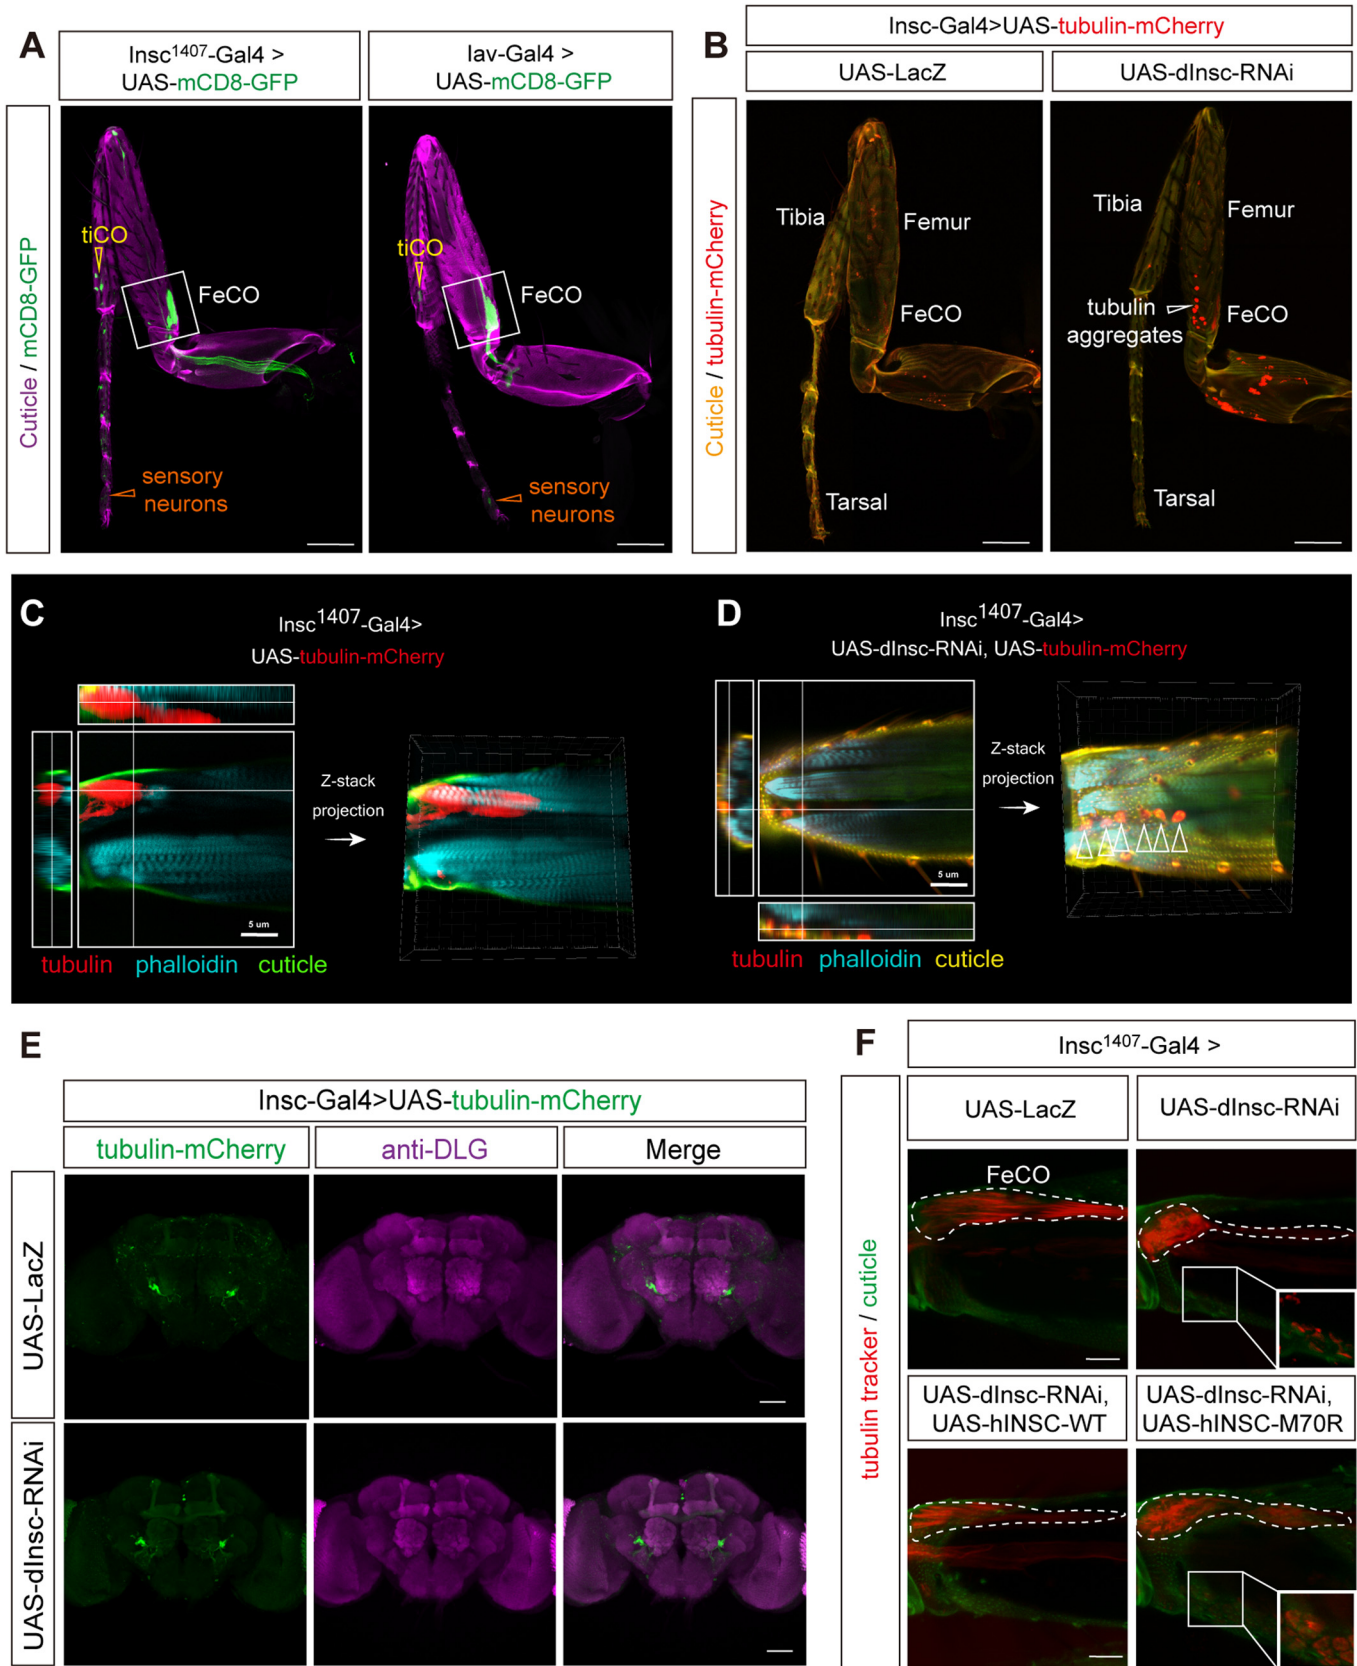

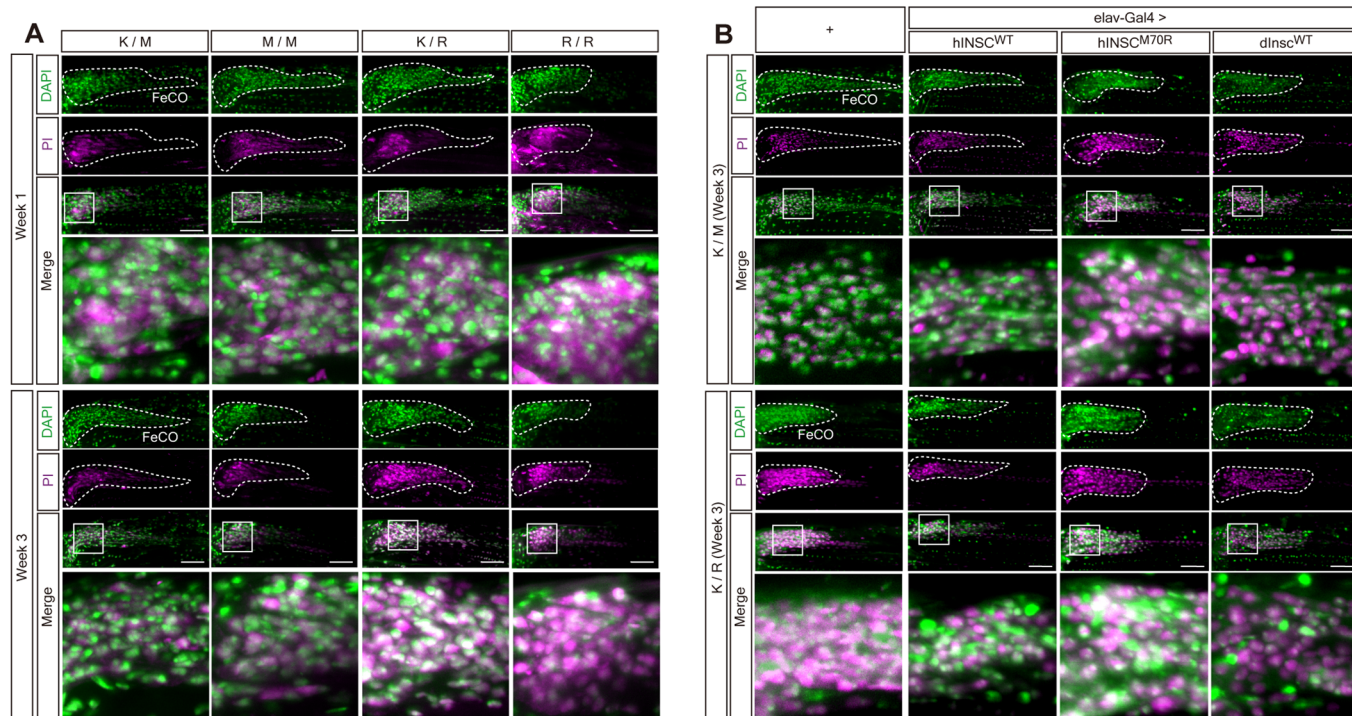

**Figure EV2. Representative confocal images of DAPI and PI co-staining in K305M and K305R CRISPR-KI flies.**

(A) Representative confocal images of FeCO neurons of 1- and 3-week-old *dlnc*<sup>+/K305R</sup> (*K/R*) and *dlnc*<sup>K305R/K305R</sup> (*R/R*) flies, co-stained with PI (magenta) and DAPI (green), compared with *dlnc*<sup>+/K305M</sup> (*K/M*) and *dlnc*<sup>K305M/K305M</sup> (*M/M*) CRISPR-KI flies. The FeCO neurons are circled by the dashed line. Scale bar: 5  $\mu$ m. (B) Representative confocal images of FeCO neurons of *K/M* and *K/R* flies overexpressing *hINSC*<sup>WT</sup>, *hINSC*<sup>M70R</sup> and *dlnc*<sup>WT</sup> under the control of pan-neuronal *elav-Gal4*, co-stained with PI (magenta) and DAPI (green), compared with *K/M* and *K/R* CRISPR-KI flies, respectively. All flies are aged to 3 weeks. The FeCO neurons are circled by the dashed line. Scale bar: 5  $\mu$ m.

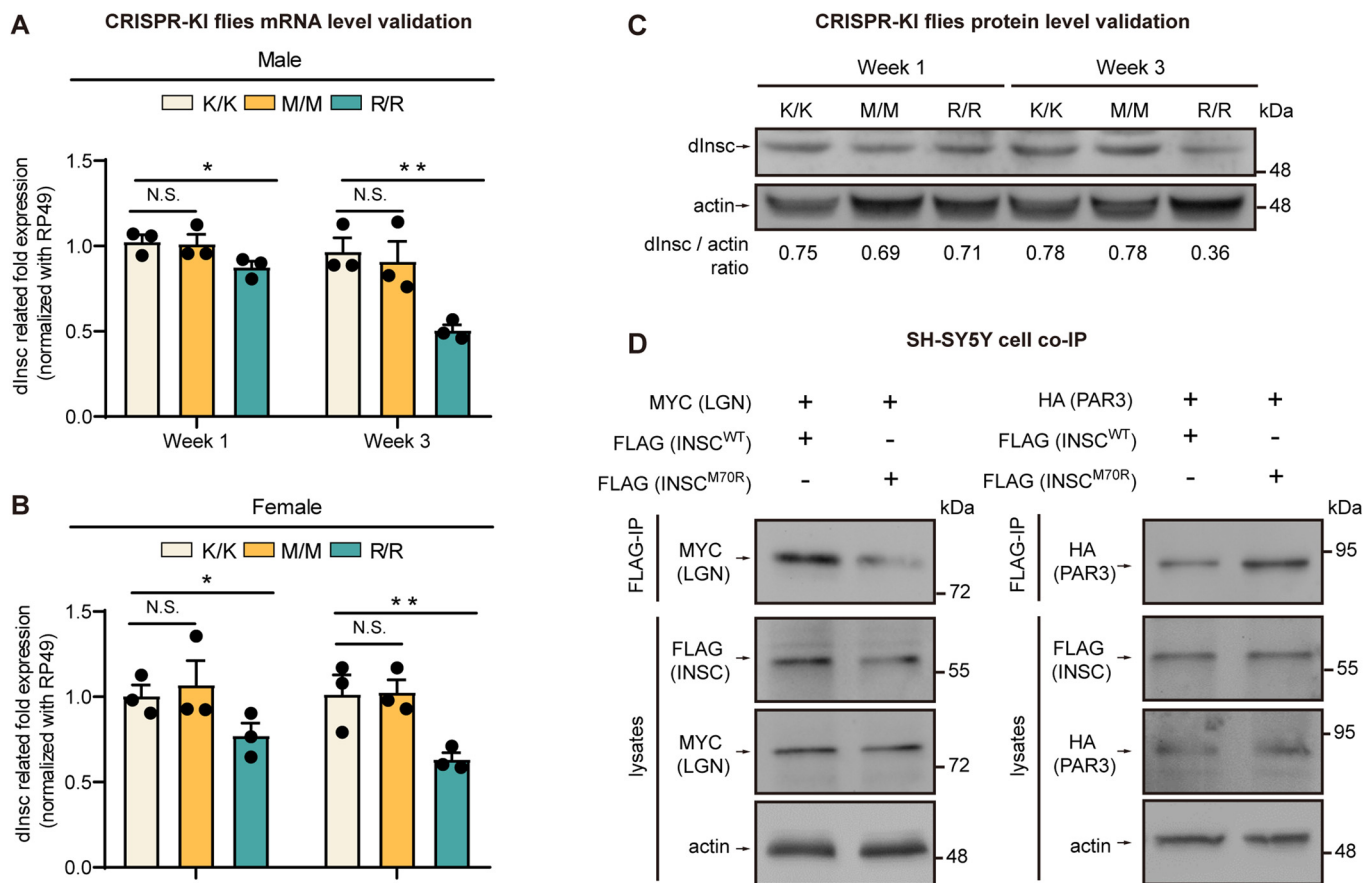

**Figure EV3. Both mRNA and protein level of R/R decrease in aging flies induced by PIL complex dysregulation.**

(A) Relative mRNA abundance in whole fly extracts of *M/M* and *R/R* male flies with its corresponding *K/K* control in week 1 and week 3; *n* = 12 flies/genotype from 3 independent technical replicates. (B) Relative mRNA abundance in whole fly extracts of *M/M* and *R/R* female flies with its corresponding *K/K* control in week 1 and week 3; *n* = 12 flies/genotype from three independent technical replicates. (C) Representative western blotting of whole fly extracts from *M/M* and *R/R* flies with its corresponding *K/K* control in week 1 and week 3; *n* = 5 flies/genotype. (D) Co-immunoprecipitation to examine the association of FLAG-hINSC (WT and M70R) with MYC-LGN (left) or HA-PAR3 (right) in SH-SY5Y cells.

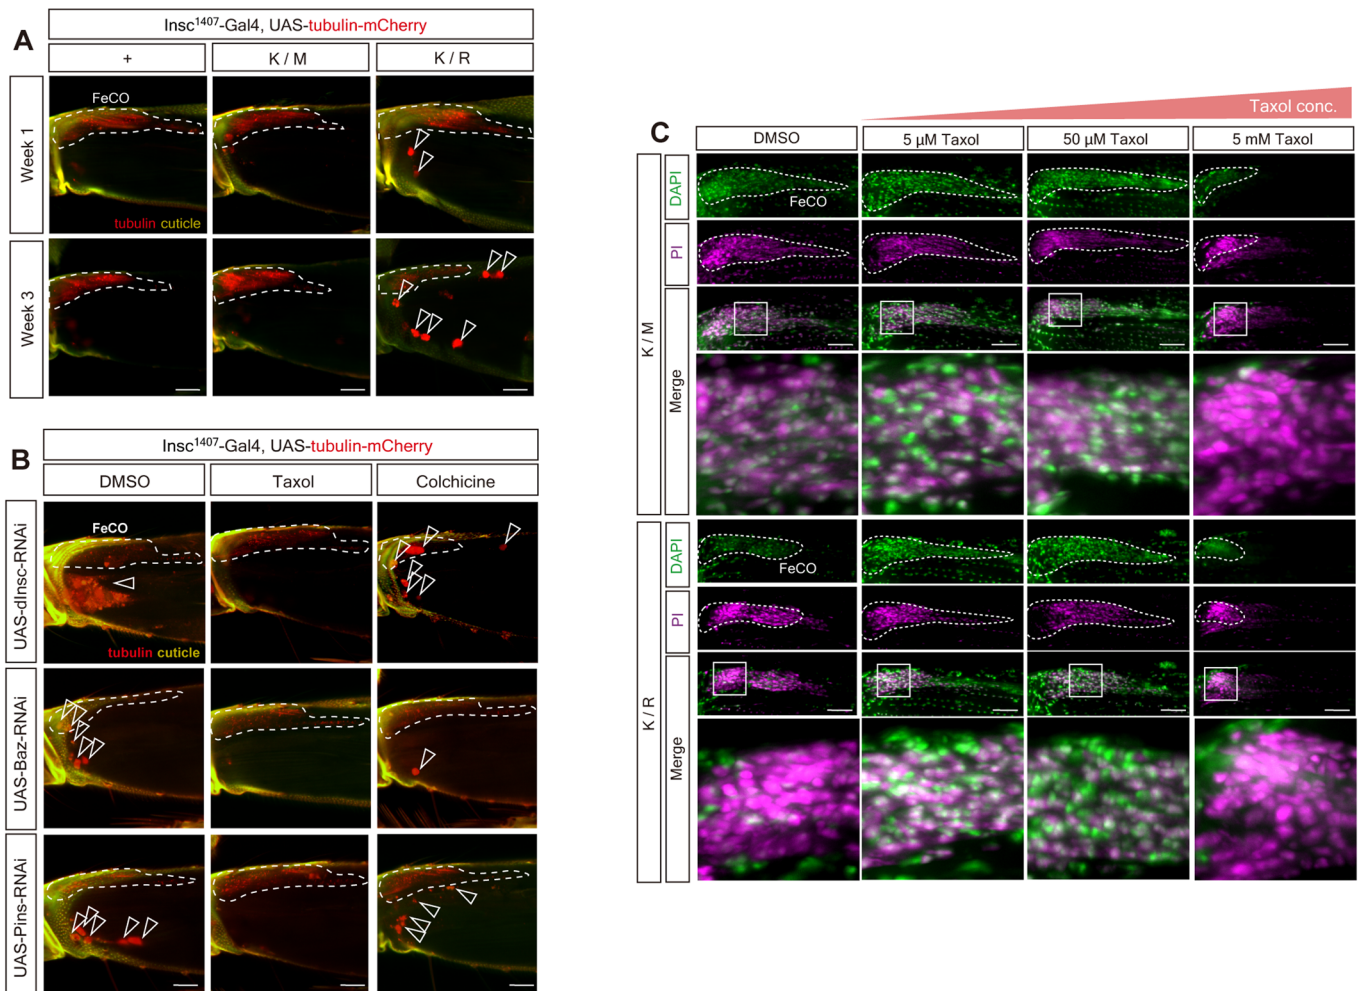

**Figure EV4. Taxol and Colchicine exert opposite effects on tubulin accumulation.**

(A) Representative confocal images of tubulin aggregation in *K/M* and *K/R* of 1- and 3-week-old CRISPR-KI flies with *dInsc*<sup>1407</sup>-Gal4>UAS-tubulin-mCherry. Arrowheads indicate the aggregative tubulin. Scale bars: 5 μm. (B) Representative confocal images of tubulin aggregation (Red indicates tubulin-mCherry) in the femur of 3-week-old *dInsc*-RNAi, *Baz*-RNAi and *Pins*-RNAi flies under *dInsc*<sup>1407</sup>-Gal4. Flies were treated with DMSO (vehicle control), Taxol (microtubule-stabilizing agent) and Colchicine (microtubule-destabilizing agent). Yellow indicates the auto-fluorescence of cuticles. The FeCO neurons are encircled by the dashed line. Arrowheads indicate the aggregative tubulin. Scale bars: 5 μm. (C) Representative confocal images of FeCO neurons of *K/M* and *K/R* CRISPR-KI flies treated with three different concentrations (5 μM, 50 μM, 5 mM) of Taxol for 7 days, co-stained with PI (magenta) and DAPI (green), and compared with vehicle control (DMSO). The FeCO neurons are encircled by the dashed line. Scale bars: 5 μm.

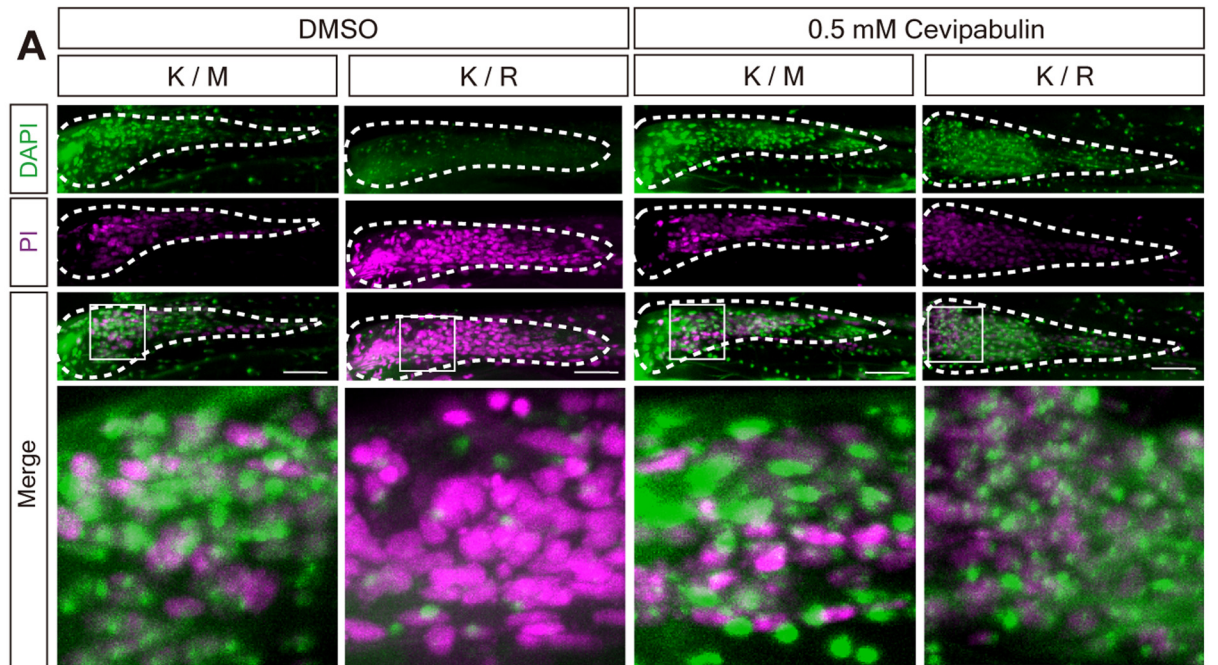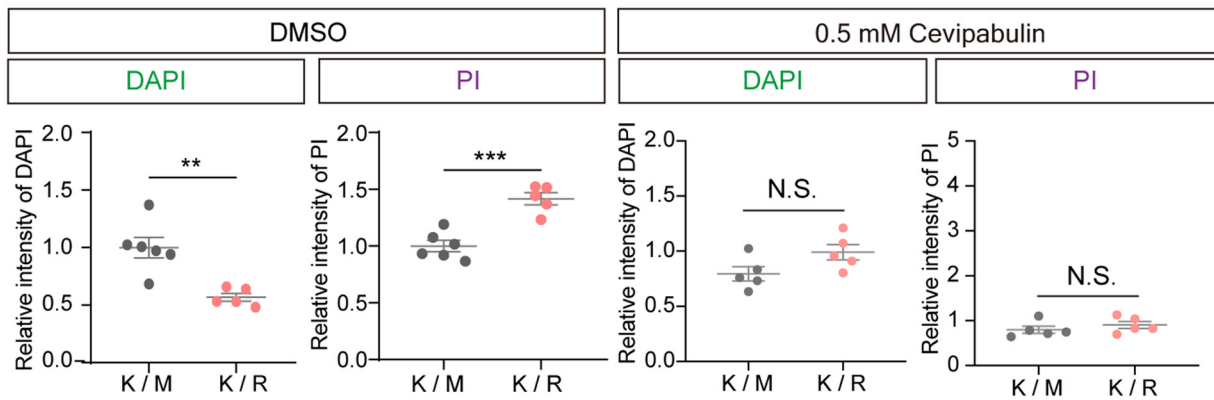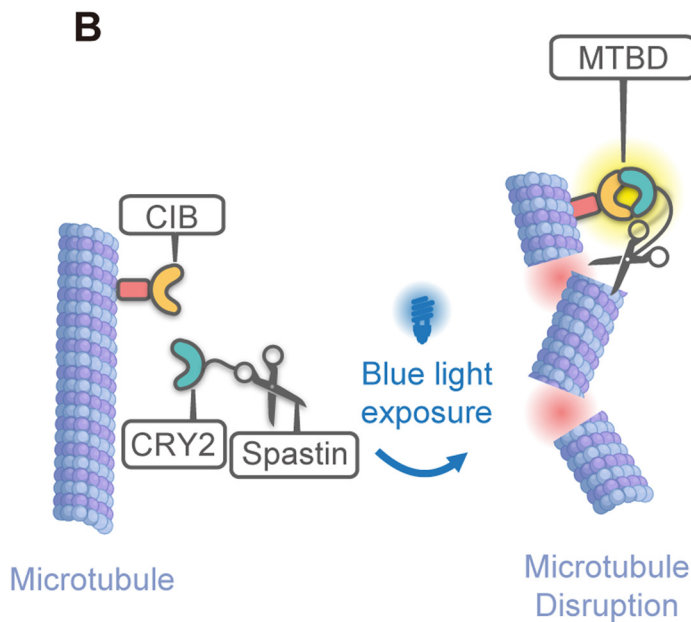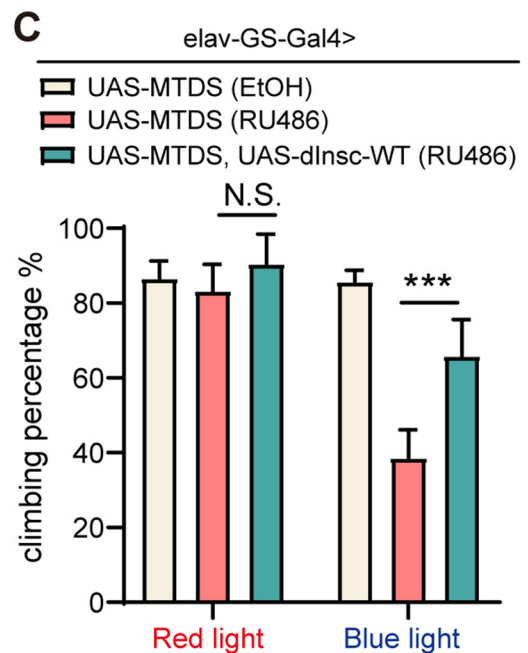

**◀ Figure EV5. The destabilization of microtubules caused by M70R mutation can be rescued with both microtubule-stabilizing agents and genetic manipulation.**

(A) Representative confocal images of FeCO neurons of *K/M* and *K/R* 3-week flies treated with 0.5 mM of microtubule stabilizer Cevipabulin for 7 days, co-stained with PI (magenta) and DAPI (green), compared with vehicle control (DMSO). The FeCO neurons are encircled by the dashed line. Scale bars: 5  $\mu$ m. Quantifications are shown in the lower panels. (B) The schematic of light-inducible microtubule disassembly system (MTDS) in a fly model. The dimerization of CRY2 and CIB can be induced by blue light. The CRY2 is fused with a microtubule-severing enzyme Spastin, and CIB is fused with microtubule-binding domain (MTBD). Dimerization upon blue light stimuli induces accumulation of Spastins on microtubules, which in turn induces disassembly of microtubules in MTDS-expressing cells. (C) Quantification of the climbing activity of Week 1 flies of UAS-MTDS (EtOH), UAS-MTDS (RU486), and UAS-MTDS, UAS-*dInsc-WT* (RU486) under the control of RU486-inducible pan-neuronal driver (*elav-GS-Gal4*) upon 48 h of blue light exposure, comparing with the conditional control (red light);  $n = 30$  flies/genotypes from 3 independent fly crosses.
